# Supplementary material for: Modelling an electrochemically roughened porous platinum electrode for water oxidation
Source: Royal Society of Chemistry journal article supplement (doi:10.1039/c5cc09947a), 2016-01-01
Supplement: c5cc09947a1.pdf [file c5cc09947a1.pdf]

*Electronic Supplementary Information for*

## **Modelling electrochemically-roughened porous platinum electrodes for water oxidation**

Alexander Weremfo,<sup>a</sup> Xunyu Lu,<sup>a</sup> Paul Carter<sup>b</sup> Brynn D. Hibbert,<sup>a\*</sup> and Chuan Zhao<sup>a\*</sup>

<sup>a</sup> School of Chemistry, UNSW Australia, Sydney, NSW 2052, Australia. E-mail:  
chuan.zhao@unsw.edu.au; b.hibbert@unsw.edu.au.

<sup>b</sup> Cochlear Ltd., 1 University Avenue, Macquarie University, NSW 2109, Australia. E-  
mail: pcarter@cochlear.com

### **Experimental**

#### **Electrochemical roughening**

A 2 mm diameter platinum disc electrode was polished to a mirror finish with progressively finer grades of alumina (Buehler), ending with 0.05- $\mu\text{m}$  grade and finally rinsed with Milli-Q water. The electrodes were electrochemically cleaned in 0.5 M  $\text{H}_2\text{SO}_4$  by cycling the electrodes between  $-0.2$  and  $+1.25$  V vs  $\text{Ag}|\text{AgCl}|\text{sat'd KCl}$  at  $0.2 \text{ V s}^{-1}$  until reproducible cyclic voltammograms were obtained. The cleaned electrode was electrochemically roughened using a repetitive square wave potential cycle. A square wave of frequency 1 kHz with lower and upper potentials of  $-0.4$  and  $+2.4$  V vs  $\text{Ag}|\text{Ag}_2\text{SO}_4|\text{sat'd K}_2\text{SO}_4$  was applied to the electrode in 0.5 M  $\text{H}_2\text{SO}_4$  for 3 min after which the potential was maintained at  $-0.4$  V until oxides on the surface were completely reduced. The reference electrode was constructed with silver sulphate, rather than silver chloride to avoid possible oxidation of leaked chloride, which deleteriously affects oxide formation. The  $\text{Ag}|\text{Ag}_2\text{SO}_4$  reference electrode was

calibrated against Ag|AgCl|sat KCl, which gave a voltage of +0.25 V in 0.5 M H<sub>2</sub>SO<sub>4</sub> solution. All potentials reported herein are referenced to Ag|AgCl|sat KCl. After roughening, the electrode was again cleaned electrochemically in a fresh 0.5 M H<sub>2</sub>SO<sub>4</sub> until reproducible cyclic voltammograms of platinum were obtained. The surface roughness ( $f_R$ ) was calculated through the relationship:

$$f_R = \frac{Q_H}{\sigma_{H,ideal} A_{geom}} \quad (\text{Eqn. S1})$$

where  $Q_H$  is the measured charge of hydrogen desorption and  $A_{geom}$  is the geometric area of the electrode.  $\sigma_{H,ideal}$  is the surface density of charge associated with monolayer adsorption of hydrogen, which has been reported as 210  $\mu\text{C cm}^{-2}$ .<sup>1</sup>

### Central composite design

The effects of reduction potential ( $E_r$ ), oxidation potential ( $E_o$ ) and ORC duration ( $t_{OCR}$ ) on surface roughness were investigated using a rotatable circumscribed central composite design. The factor levels in experimental design were given as coded values that are mapped onto a range of actual values

$$X_i = \frac{x_i - x_0}{\Delta x} \quad (\text{Eqn. S2})$$

where  $X_i$  is a coded value of the factor. Accordingly,  $x_i$  is the value of the factor,  $x_0$  is the value of the factor at the centre and  $\Delta x$  is the step change.

For the circumscribed central composite design, the selected factors were coded at 5 levels (-1.68, -1, 0, 1 and 1.68) (Table S1), and the range of real values was chosen based on preliminary experiments. This design included a total of  $2^k + 2k + r$  runs, where  $k$  is the number of studied factors,  $2^k$  are the points from the factorial experiments carried out at the corners of the cube,  $2k$  are the points carried out on the axes at a distance of  $\pm\alpha$  from the centre and  $r$  is the number of replicate experiments at the central point. For a three variable

central composite design,  $\alpha$  value of 1.68 was used to ensure a rotatability of the design as calculated by Eqn S3.

$$\alpha = \pm(2^k)^{1/4} \quad (\text{Eqn. S3})$$

Where  $k$  is the number of factors studied.

**Table S1.** The experimental range and levels of the variables in the CCD

| Variable                | code             | Levels ( $\alpha = 1.68$ ) |       |       |       |               |
|-------------------------|------------------|----------------------------|-------|-------|-------|---------------|
|                         |                  | ( $-\alpha$ )              | (-1)  | (0)   | (+1)  | ( $+\alpha$ ) |
| Reduction potential (V) | $E_r$            | -0.32                      | -0.23 | -0.15 | -0.05 | 0.018         |
| Oxidation potential (V) | $E_o$            | 2.23                       | 2.40  | 2.65  | 2.90  | 3.07          |
| ORC time (min)          | $t_{\text{ORC}}$ | 7.91                       | 12.00 | 18.00 | 24.00 | 28.09         |

In this study, fourteen experiments and six replications at the centre point were performed in random order. A second order polynomial model with interactions of order 2 (Eqn. S4) was used to model surface roughness <sup>2</sup> :

$$f_R = \beta_0 + \beta_1 E_r + \beta_2 E_o + \beta_3 t_{\text{ORC}} + \beta_{11} E_r^2 + \beta_{22} E_o^2 + \beta_{33} t_{\text{ORC}}^2 + \beta_{12} E_r E_o + \beta_{13} E_r t_{\text{ORC}} + \beta_{23} E_o t_{\text{ORC}} \quad (\text{Eqn. S4})$$

where  $\beta_0$  is a constant and  $\beta_i, \beta_{ii}, \beta_{ij}$  ( $i = 1,2,3, j = 1,2,3$ ) are the coefficients of the linear, quadratic and interaction effects, respectively. The three-way interaction was assumed to be zero.

### Oxygen evolution

The electrocatalytic OER activity of the roughened Pt was studied by linear sweep voltammetry in a three-electrode cell, with a Ag/AgCl (3 M KCl) reference electrode and a Pt wire counter electrode. The potentials obtained in this study were all calibrated to reversible hydrogen electrode reference (RHE) according to Eqn. S5 (ESI†) for comparison purposes.

$$E_{RHE} = E_{Ag/AgCl} + 0.197 + 0.059 pH \quad (\text{Eqn. S5})$$

Steady state polarisation curves for oxygen evolution were recorded in 0.5 M H<sub>2</sub>SO<sub>4</sub> at 5 mV s<sup>-1</sup> scan rate. Electrochemical impedance spectroscopy (EIS) measurements were performed using a Solatron 1250 frequency response analyser. EIS spectra were acquired in 0.5 M H<sub>2</sub>SO<sub>4</sub> at 1.6 V vs RHE with a  $\pm 10$  mV amplitude ac signal over a frequency range from 100 KHz – 0.1 Hz. The impedance data were modelled with ZSimpwin software

**Table S2.** 3-factor CDD matrix (coded values – see Table 3.1 for equivalent actual values) and the value of  $f_R$ .

| Run | $E_r$ | $E_o$ | $t_{ORC}$ | $f_R$ |
|-----|-------|-------|-----------|-------|
| 1   | -1    | -1    | -1        | 338   |
| 2   | -1    | -1    | +1        | 534   |
| 3   | -1    | +1    | -1        | 541   |
| 4   | -1    | +1    | +1        | 777   |
| 5   | +1    | -1    | -1        | 425   |
| 6   | +1    | -1    | +1        | 632   |
| 7   | +1    | +1    | -1        | 393   |
| 8   | +1    | +1    | +1        | 628   |
| 9   | -1.68 | 0     | 0         | 424   |
| 10  | +1.68 | 0     | 0         | 449   |
| 11  | 0     | -1.68 | 0         | 520   |
| 12  | 0     | +1.68 | 0         | 625   |
| 13  | 0     | 0     | -1.68     | 395   |
| 14  | 0     | 0     | +1.68     | 635   |
| 15  | 0     | 0     | 0         | 630   |
| 16  | 0     | 0     | 0         | 649   |
| 17  | 0     | 0     | 0         | 652   |
| 18  | 0     | 0     | 0         | 645   |
| 19  | 0     | 0     | 0         | 646   |
| 20  | 0     | 0     | 0         | 643   |

**Table S3.** Analysis of variance (ANOVA) for response surface quadratic model

| Source        | Degrees of freedom | Sum of squares | Mean square | F <sub>effect</sub> | Prob F > F <sub>effect</sub> |
|---------------|--------------------|----------------|-------------|---------------------|------------------------------|
| Model         | 9                  | 253880.10      | 28208.90    | 24.50               | <0.0001                      |
| $E_r$         | 1                  | 342.89         | 342.89      | 0.30                | 0.5972                       |
| $E_o$         | 1                  | 25212.87       | 25212.87    | 21.90               | 0.0009                       |
| $t_{OCR}$     | 1                  | 119237.60      | 119237.60   | 103.58              | <0.0001                      |
| $E_r E_o$     | 1                  | 29080.28       | 29080.28    | 25.26               | 0.0005                       |
| $E_r t_{OCR}$ | 1                  | 11.79          | 11.79       | 0.01                | 0.9214                       |
| $E_o t_{OCR}$ | 1                  | 567.68         | 567.68      | 0.49                | 0.4986                       |
| $E_r^2$       | 1                  | 63519.30       | 63519.30    | 55.18               | <0.0001                      |
| $E_o^2$       | 1                  | 4801.71        | 4801.71     | 4.17                | 0.06838                      |
| $t_{OCR}^2$   | 1                  | 21309.88       | 21309.88    | 18.51               | 0.0016                       |
| Residual      | 10                 | 11511.72       | 1151.17     |                     |                              |

**Table S4.** Equivalent circuit parameters for smooth and roughened platinum catalysts according to the EIS spectra shown in figure Fig. 3c.

| $f_R$      | CPE<br>(mF cm <sup>-2</sup> ) | $n$  | $R_s$<br>( $\Omega$ cm <sup>2</sup> ) | $R_e$<br>( $\Omega$ cm <sup>2</sup> ) | $R_{ct}$<br>( $\Omega$ cm <sup>2</sup> ) |
|------------|-------------------------------|------|---------------------------------------|---------------------------------------|------------------------------------------|
| 2 (smooth) | 0.1                           | 0.95 | 0.40                                  | 33.94                                 | 1040.3                                   |
| 124        | 11.5                          | 0.92 | 0.38                                  | 0.20                                  | 5.7                                      |
| 268        | 25.3                          | 0.91 | 0.42                                  | 0.11                                  | 2.7                                      |
| 455        | 44.6                          | 0.92 | 0.41                                  | 0.02                                  | 1.6                                      |

Table S4 summarises the impedance parameters obtained by fitting the spectra using an equivalent circuit model represented by  $R_s(R_e Q_1)(R_{ct} Q_{dl})$ , in accordance with the predicted circuit for OER.<sup>3</sup> The  $R_s$  is the solution resistance;  $R_e$  is the electrode resistance,  $R_{ct}$  is the charge transfer resistance at the oxide/solution interface, which directly relates to the OER

activity. The capacitive element Q was treated as constant-phase-element (CPE), which is often used to model depressed semicircles due to heterogeneities and surface roughness.

## Reference

1. S. Trasatti and O. A. Petrii, *J. Electroanal. Chem.*, 1992, **327**, 353.
2. R. Leardi, *Anal. Chim. Acta*, 2009, **652**, 161.
3. K. Kadakia, M. K. Datta, O. I. Velikokhatnyi, P. Jampani, S. K. Park, S. J. Chung and P. N. Kumta, *J. Power Sources*, 2014, **245**, 362; W. Hu, H. Zhong, W. Liang and S. Chen, *ACS Appl. Mater. Interfaces*, 2014, **6**, 12729.
